# Supplementary material for: Liquid-crystal-assisted chiral nanoscintillator architectures with circular polarization degree exceeding 0.7 in X-ray radioluminescence
Source: Royal Society of Chemistry journal article supplement (doi:10.1039/d6sc02304e), 2026-05-18
Supplement: d6sc02304e1.pdf [file d6sc02304e1.pdf]

## Materials and Methods

### Materials

PbBr<sub>2</sub> (99.9%) was purchased from Macklin. PbI<sub>2</sub> (99%) and oleic acid (OA, 90%) were purchased from Heowns. Formamidine Hydrochloride (FACl, 98%) and Formamidine Bromide (FABr, 99.5%) were purchased from Adamas. N, N-dimethylformamide (DMF, 99.9%) and n-Hexane (98%) were purchased from Aladdin. Oleylamine (OAm, 90%) and Acetonitrile (99.9%) were purchased from Energy Chemical. Dichloromethane was purchased from Sinopharm Chemical. Polysulfone (98%, M.W ~80000) was purchased from Meryer. SLC1717 and LC756 were bought from the Nanjing Ningcui Optical Technology Co., Ltd. Chiral dopant *R*-5011, *S*-5011 and *R*-811 were bought from the Nanjing Sanjiang New Materials R & D Co., Ltd. The PDMS elastomer (Sylgard®184) was purchased from Dow Corning. All the reagents and solvents were used as received without any further purification.

### Characterization

Photoluminescence, radioluminescence, CPRL and reflection spectra were recorded on a HORIBA iHR-550 spectrometer. The XRD patterns were measured on a BRUKER D8 ADVANCE X-ray diffractometer. The UV-vis absorption spectra of perovskite were recorded on a Rayleigh UV-2200 UV-vis spectrometer. TEM and HRTEM characterization were performed using JEM-F200. CPL spectra together with  $g_{lum}$  values were measured and recorded at room temperature on a JASCO CPL-300 spectrophotometer. CD spectra were measured on a JASCO J-1500 spectrophotometer. POM images were recorded on a Nexcope NE620 microscope.

### Synthesis

FAPbClBr<sub>2</sub> nanocrystals: FACl (8.0 mg, 0.1 mmol) and PbBr<sub>2</sub> (36.7 mg, 0.1 mmol) were dissolved in 1 mL DMF forming 0.1 mM solution. Then, 200  $\mu$ L OA and 15  $\mu$ L OAm were added. Next, 100  $\mu$ L of this mixture was injected into 3 mL of chloroform. Nanocrystals were formed within seconds as a colorless solution. For purification, obtained nanocrystal solution was precipitated once with 3 mL of acetonitrile mixture followed by centrifugation at 8000 rpm for 5 min.

FAPbBr<sub>3</sub> nanocrystals: FAPbBr (12.5 mg, 0.1 mmol) and PbBr<sub>2</sub> (36.7 mg, 0.1 mmol) were dissolved in 1 mL DMF forming 0.1 mM solution. Then, 200 μL OA and 20 μL OAm were added. The remaining experimental procedures followed FAPbClBr<sub>2</sub> nanocrystals.

FAPbBrI<sub>2</sub> nanocrystals: FAPbBr (12.5 mg, 0.1 mmol) and PbI<sub>2</sub> (46.1 mg, 0.1 mmol) were dissolved in 1 mL DMF forming 0.1 mM solution. Then, 200 μL OA and 25 μL OAm were added. The remaining experimental procedures followed FAPbClBr<sub>2</sub> nanocrystals.

Fabrication of perovskite nanoscintillator film: In a typical experiment, 30 mg of FAPbBr<sub>3</sub> nanocrystals were dissolved in 0.3 mL chloroform. After sonicating for 10 minutes, 30 mg of polysulfone was added. The mixture was sonicated for another 5 hours to ensure that FAPbBr<sub>3</sub> nanocrystals and polysulfone were well mixed. The viscous solution was carefully coated on the quartz plates to get the FAPbBr<sub>3</sub>@polysulfone film. The FAPbClBr<sub>2</sub>@polysulfone film and FAPbBrI<sub>2</sub>@polysulfone film were obtained via the same process.

X-ray image collection: Commercial camera (Alpha 7IV SONY) was used to take images for the X-ray imaging screens. The ISO, aperture, and shutter were set at 1000, 6.3, and 15 s for samples excited by X-ray (dose rate: 11.89 μGy s<sup>-1</sup>).

Fabrication of the *R/S*-architecture: In a typical experiment, a liquid crystal cell with a 20 μm cell gap are homemade. Two cleaning quartz were bonded by UV-curable adhesive (irradiating with a UV light for 20 s), spaced with a 20-μm-thick polyimide film. SLC1717 (10 mg), *R/S*-5011 and dichloromethane (3 mL) were added to a 5 mL sample bottle. The doping concentration were 3.38%, 2.89% and 2.39%. After ultrasonic treatment for 5 min, the mixture was heated and dried in a vacuum oven at 80 °C to obtained doped CLCs. Then, the CLCs was loaded into a liquid crystal cell by capillary action, and the liquid crystal cell was sealed with the UV-curable adhesive. Finally, the *R/S*-architecture was fabricated by depositing the FAPbBr<sub>3</sub>@polysulfone film onto one quartz of a liquid crystal cell.

Fabrication of patterned chiral nanoscintillators: In a typical experiment, firstly, 300 mg FAPbBr<sub>3</sub> nanocrystals solution (10 mL n-hexane) was added into 15 mg of Sylgard 184 component B (curing agent) with stirring. After vacuum treatment at 40 °C for 1 h to remove solvent, the mixture was further added into 135 g of Sylgard 184 component A (silicone elastomer prepolymer). Then the pattern, “the left wing of a butterfly”, was fabricated on a liquid crystal cell surface via a two-step screen printing technique. Finally, a “butterfly” pattern displaying a green left wing under X-ray irradiation could be prepared in a vacuum desiccator at 70 °C overnight. The “butterfly” pattern displaying a red right wing under X-ray irradiation was obtain via the similar process.

### Figures

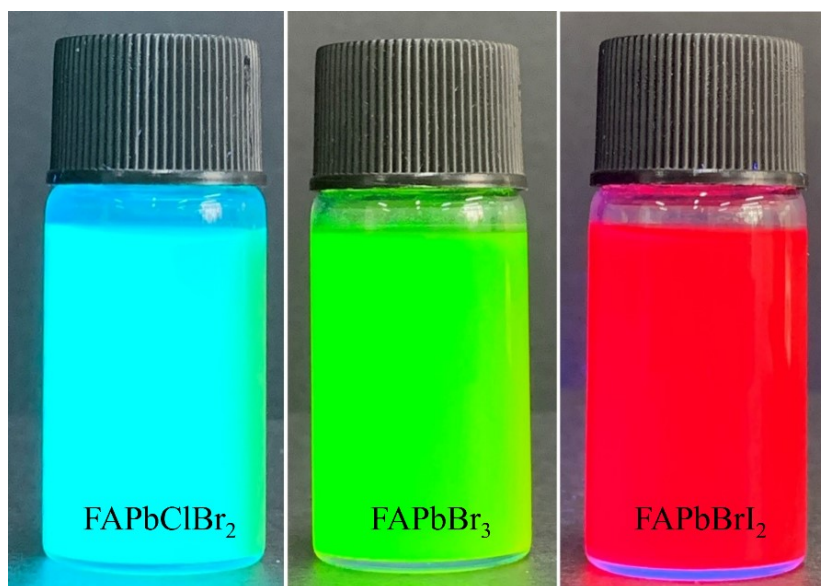

**Figure S1.** Photographs of FAPbClBr<sub>2</sub>, FAPbBr<sub>3</sub> and FAPbBrI<sub>2</sub> perovskite nanocrystals in n-hexane under 365 nm UV excitation.

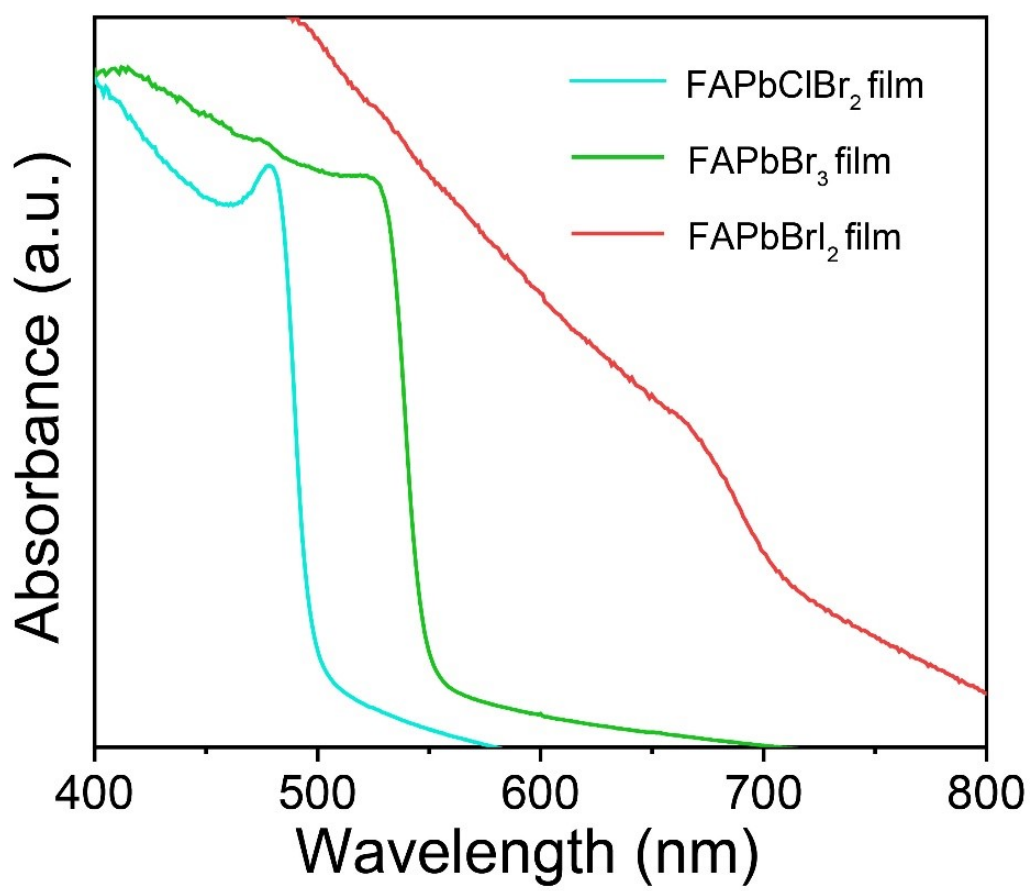

**Figure S2.** UV-Vis absorption spectra of FAPbClBr<sub>2</sub>, FAPbBr<sub>3</sub> and FAPbBrI<sub>2</sub> perovskite nanocrystal films.

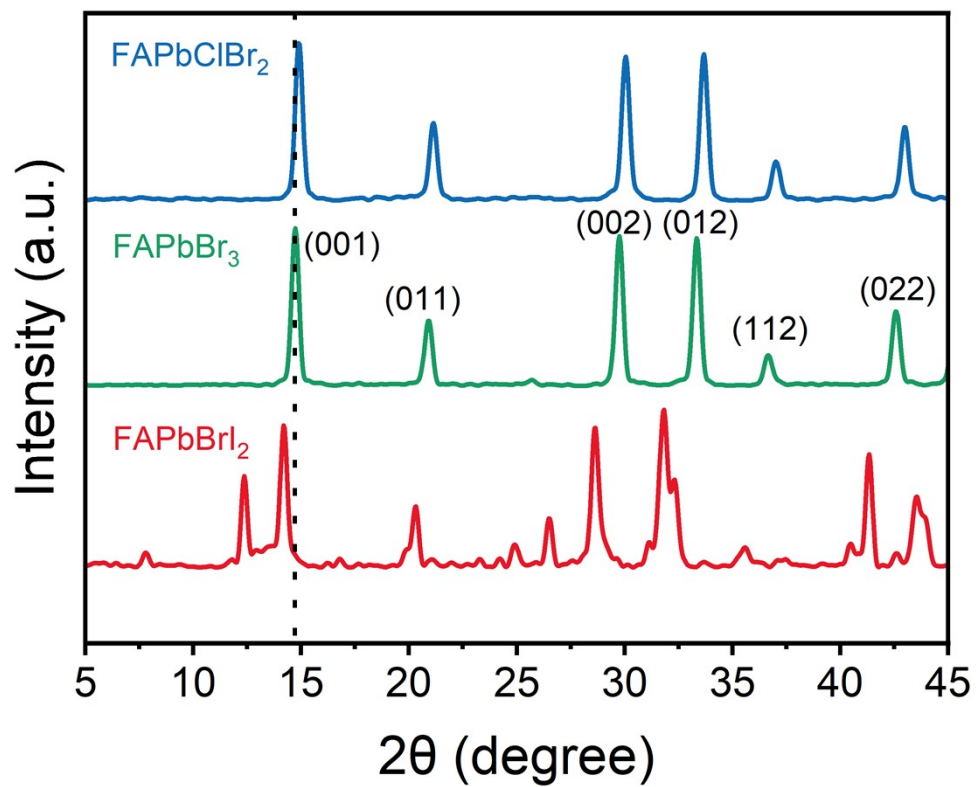

**Figure S3.** XRD spectra of FAPbClBr<sub>2</sub>, FAPbBr<sub>3</sub> and FAPbBrI<sub>2</sub> nanocrystals.

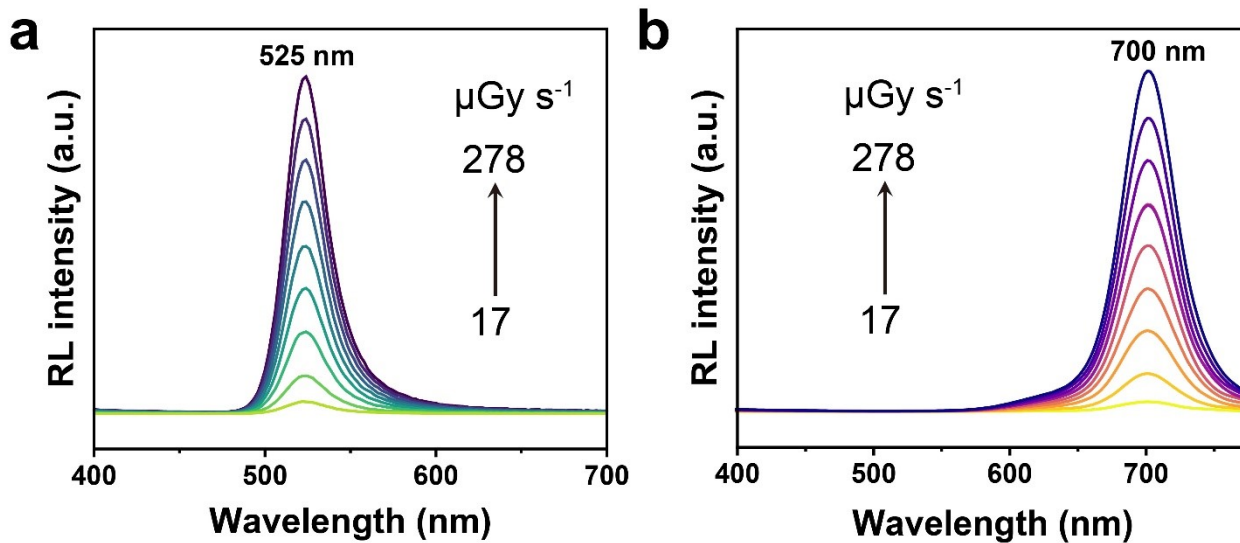

**Figure S4.** Radioluminescence spectra of (a) FAPbClBr<sub>2</sub>@polysulfone and (b) FAPbBrI<sub>2</sub>@polysulfone film under different X-ray dose rates.

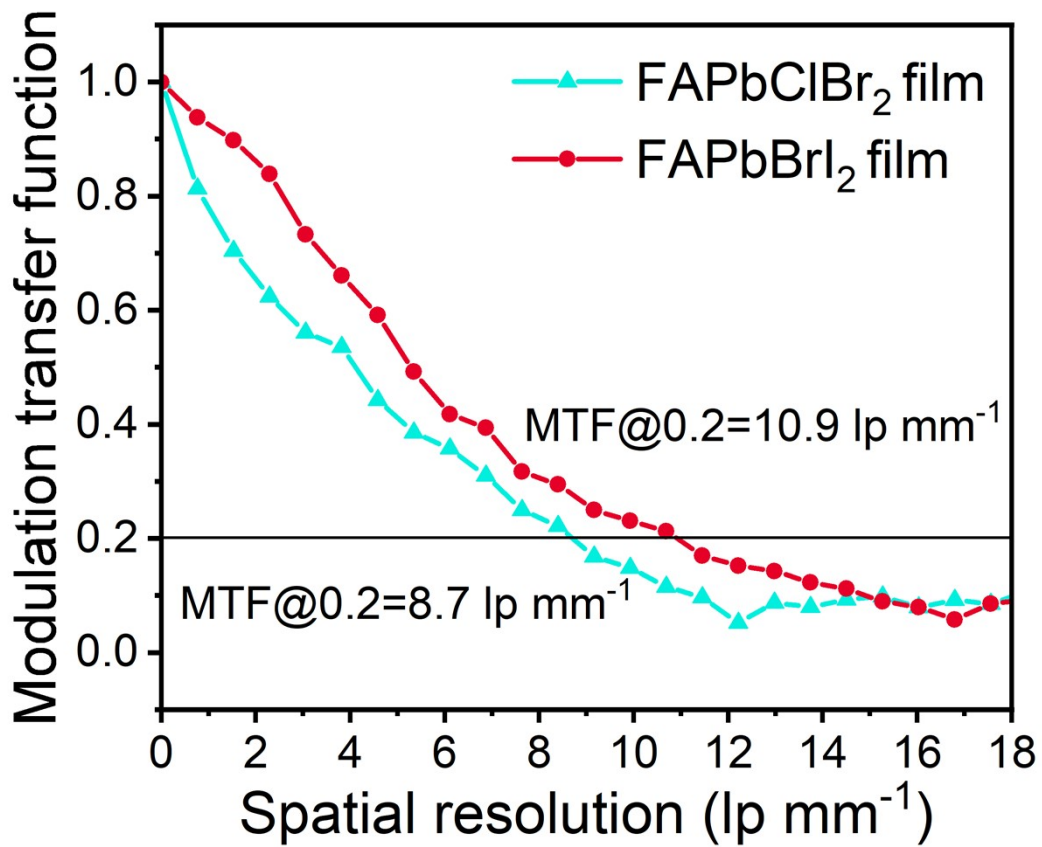

**Figure S5.** MTFs of X-ray imaging obtained from FAPbClBr<sub>2</sub>@polysulfone and FAPbBrI<sub>2</sub>@polysulfone film.

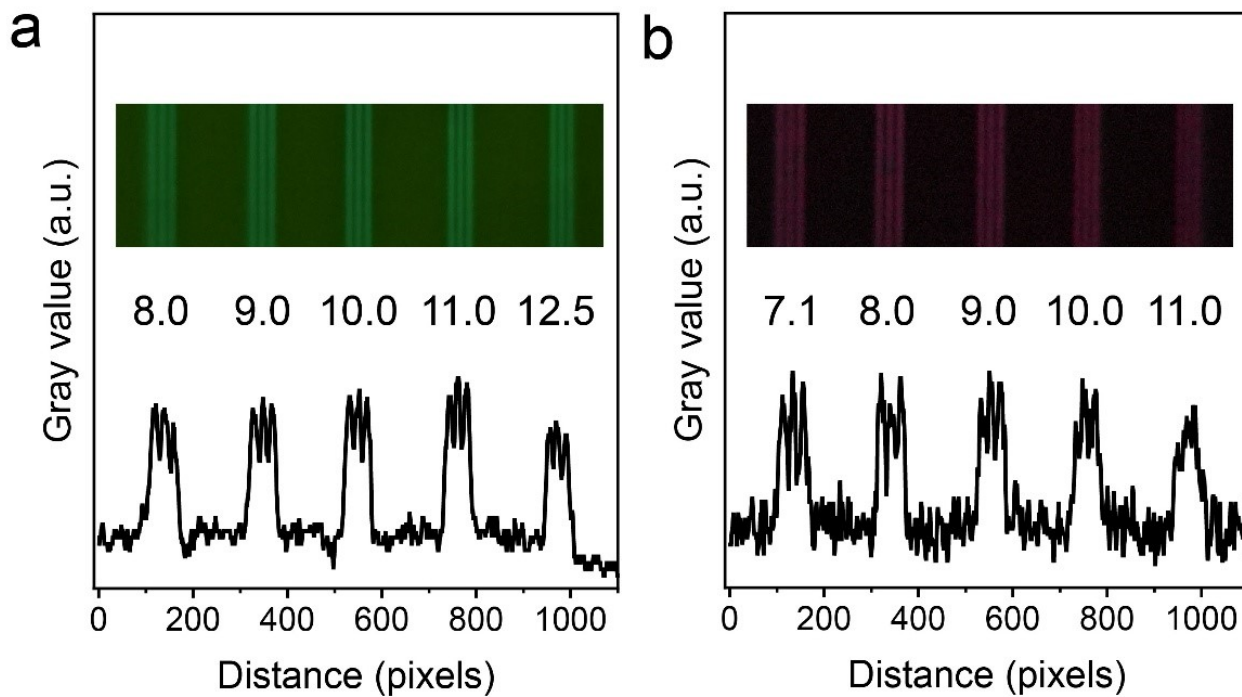

**Figure S6.** X-Ray image of a standard line-pair card obtained from FAPbClBr<sub>2</sub>@polysulfone and FAPbBrI<sub>2</sub>@polysulfone film.

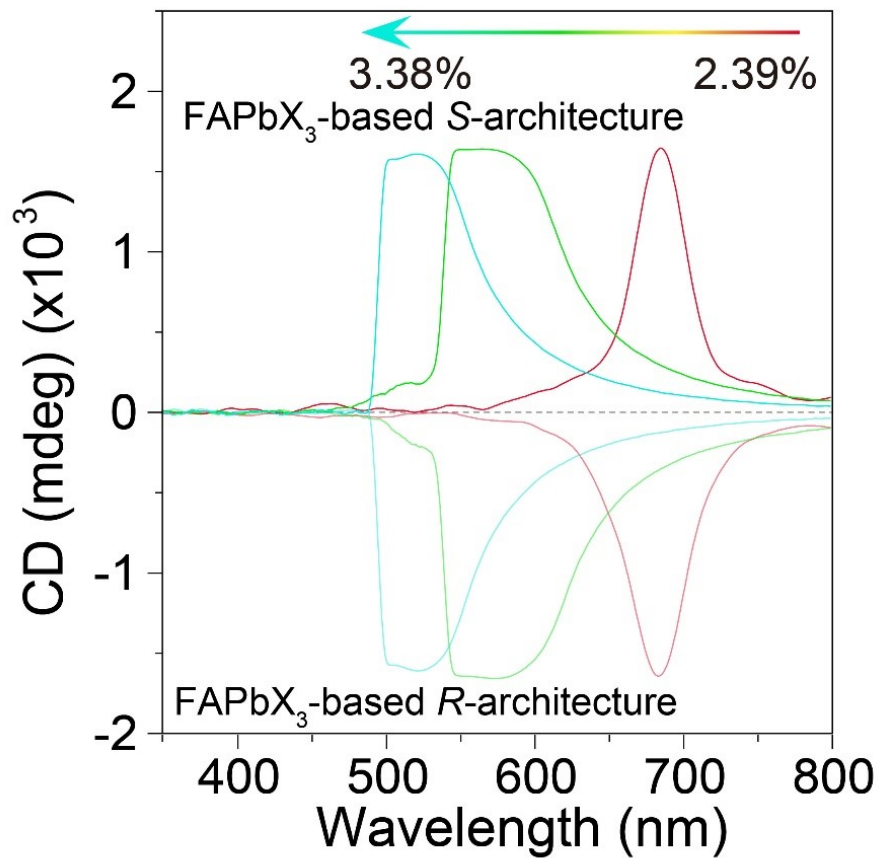

**Figure S7.** CD spectra of FAPbClBr<sub>2</sub>, FAPbBr<sub>3</sub> and FAPbBrI<sub>2</sub>-based *S*- and *R*-architecture.

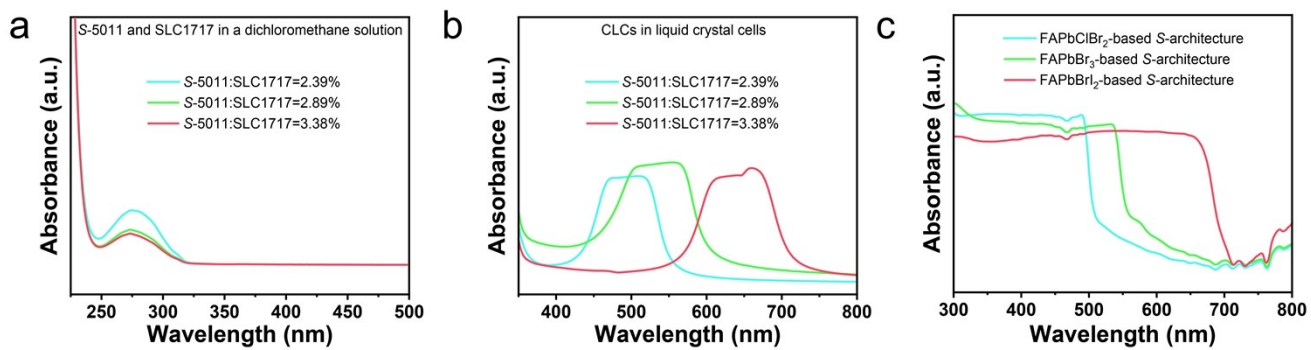

**Figure S8.** (a) UV-Vis absorption spectra of *S*-5011 and SLC1717 in dichloromethane solution. (b) UV-Vis absorption spectra of CLCs in the liquid crystal cells. (c) UV-Vis absorption spectra of FAPbClBr<sub>2</sub>, FAPbBr<sub>3</sub> and FAPbBrI<sub>2</sub>-based *S*-architecture.

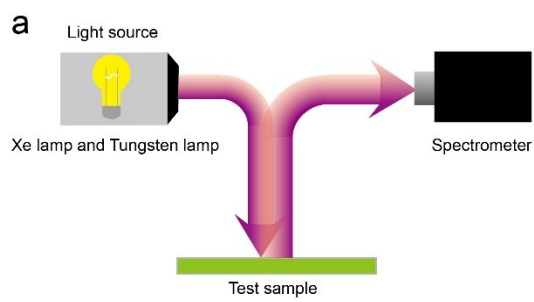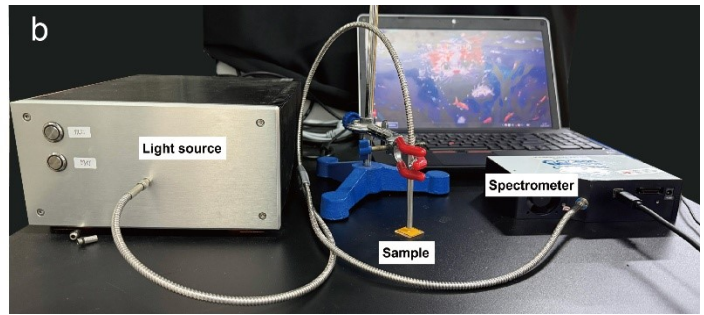

**Figure S9.** (a) Schematic diagram and (b) photograph of the optical path for reflection spectroscopy measurement.

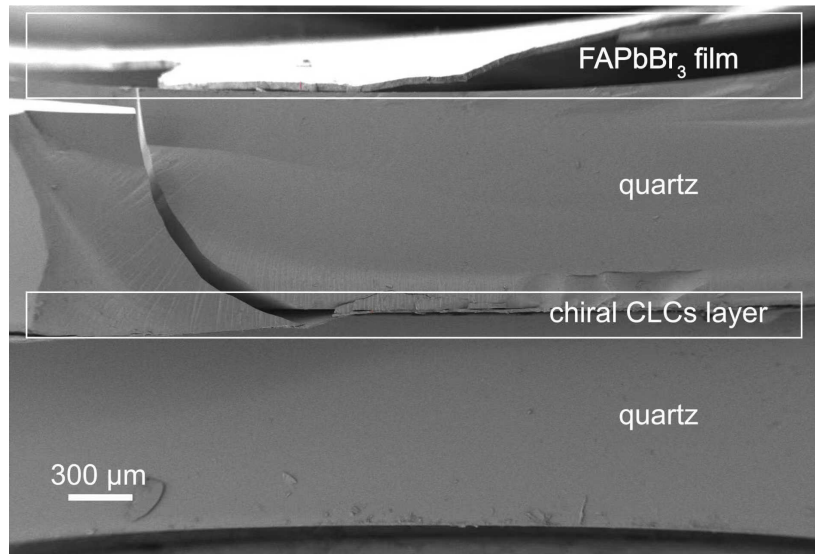

**Figure S10.** Cross-sectional SEM image of FAPbBr<sub>3</sub>-based *R*-architecture.

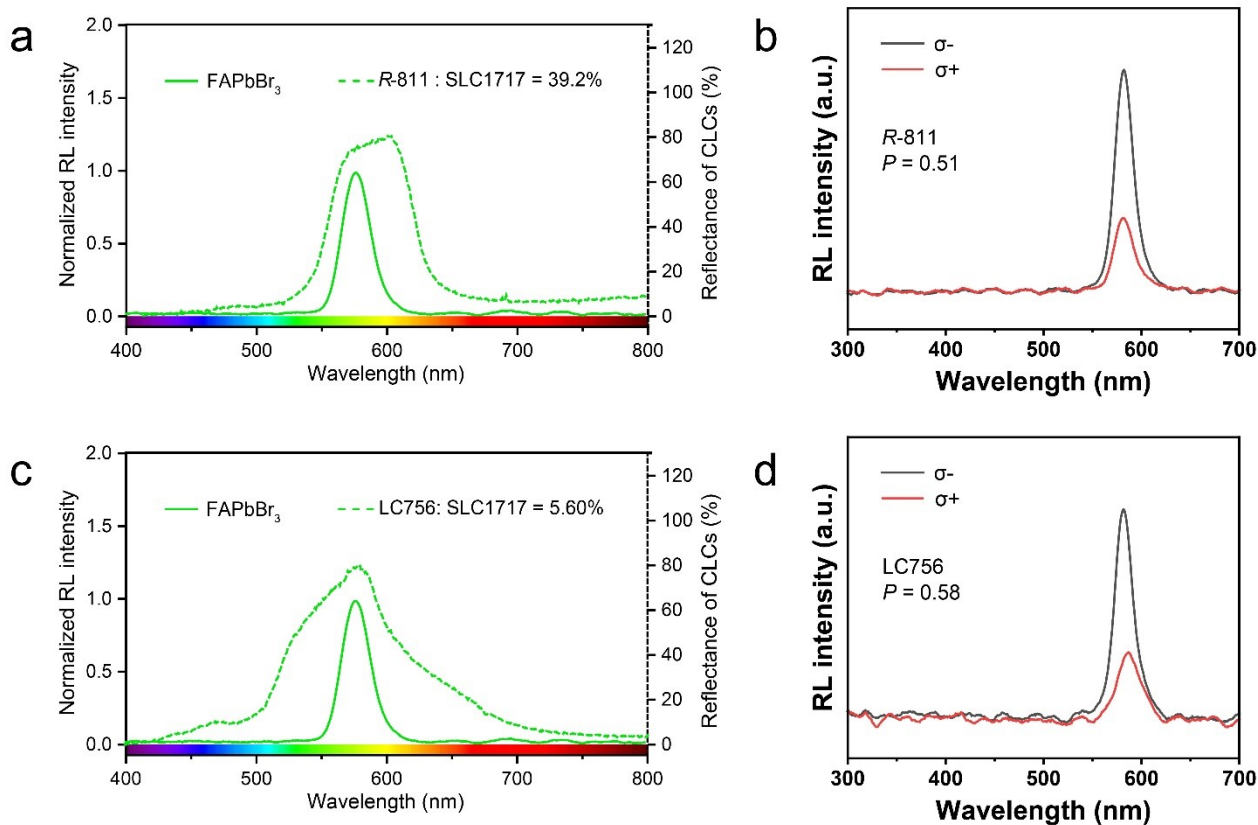

**Figure S11. Substitution of the chiral dopant.** (a) Reflection spectra of SLC1717 with 39.2% *R*-811 (dashed line) and the radioluminescence spectra of FAPbBr<sub>3</sub>@polysulfone film (solid line). (b) Polarization-resolved radioluminescence spectra of FAPbBr<sub>3</sub>-based *R*-811-architecture. (c) Reflection spectra of SLC1717 with 5.60% LC756 (dashed line) and the radioluminescence spectra of FAPbBr<sub>3</sub>@polysulfone film (solid line). (b) Polarization-resolved radioluminescence spectra of FAPbBr<sub>3</sub>-based LC756-architecture.

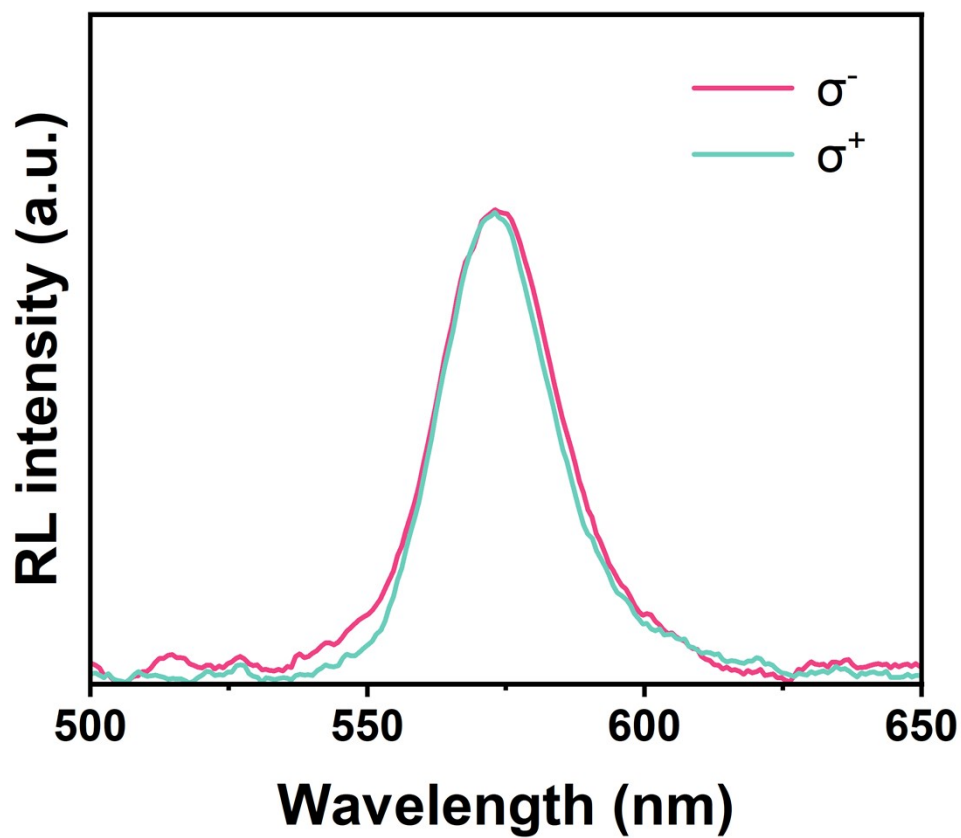

**Figure S12.** CPRL of achiral FAPbBr<sub>3</sub>@polysulfone film without chiral CLCs excited by X-ray.

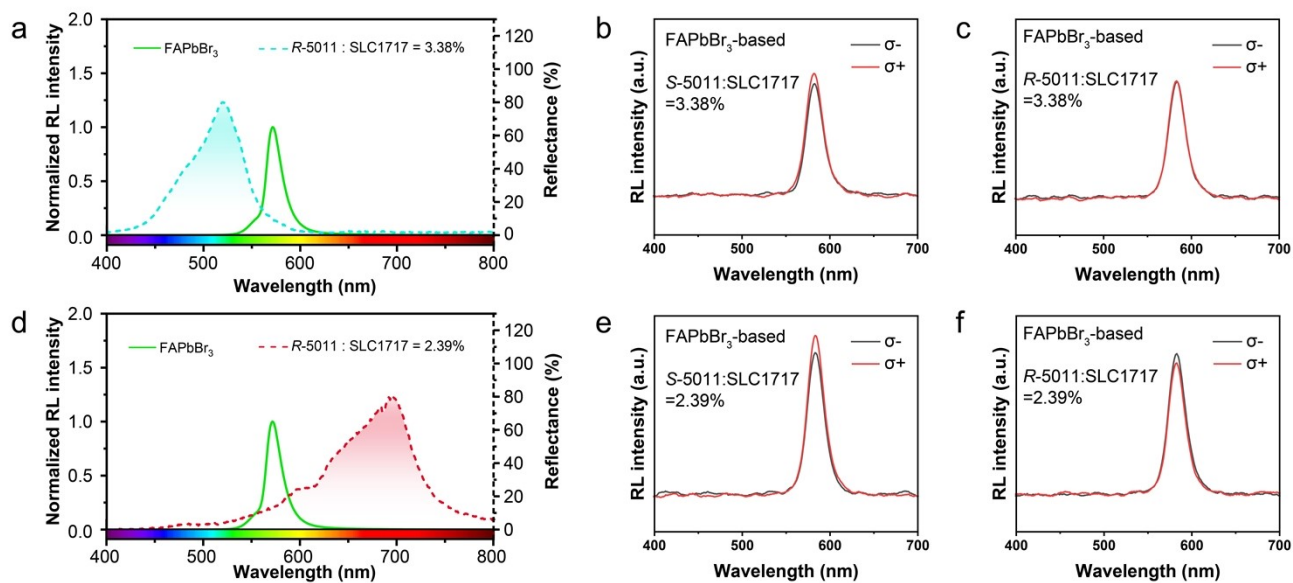

**Figure S13.** (a) Reflection spectra of SLC1717 with 3.38% *R*-5011 (dashed line) and radioluminescence spectra of FAPbBr<sub>3</sub>@polysulfone film (solid line). Polarization-resolved radioluminescence spectra of FAPbBr<sub>3</sub>-based (b) *S*-5011 and (c) *R*-5011 3.38% architecture. (d) Reflection spectra of SLC1717 with 2.39% *R*-5011 (dashed line) and radioluminescence spectra of FAPbBr<sub>3</sub>@polysulfone film (solid line). Polarization-resolved radioluminescence spectra of FAPbBr<sub>3</sub>-based (e) *S*-5011 and (f) *R*-5011 2.39% architecture.

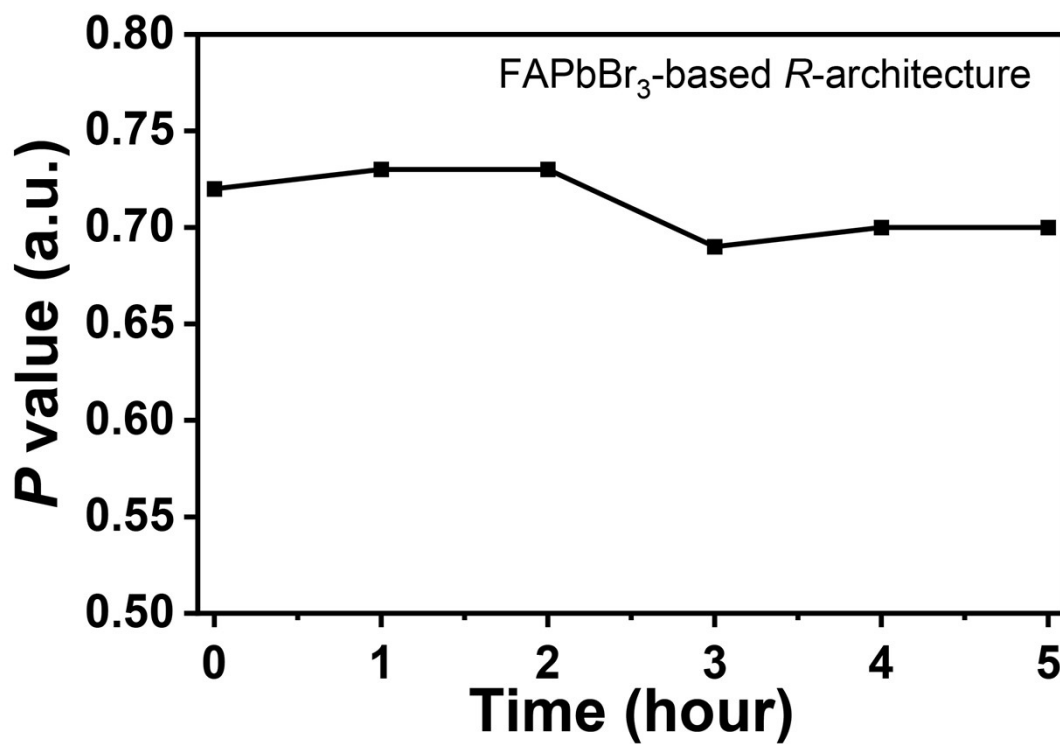

Figure S14. Variation in *P* values under air exposure lasting for 5 h.

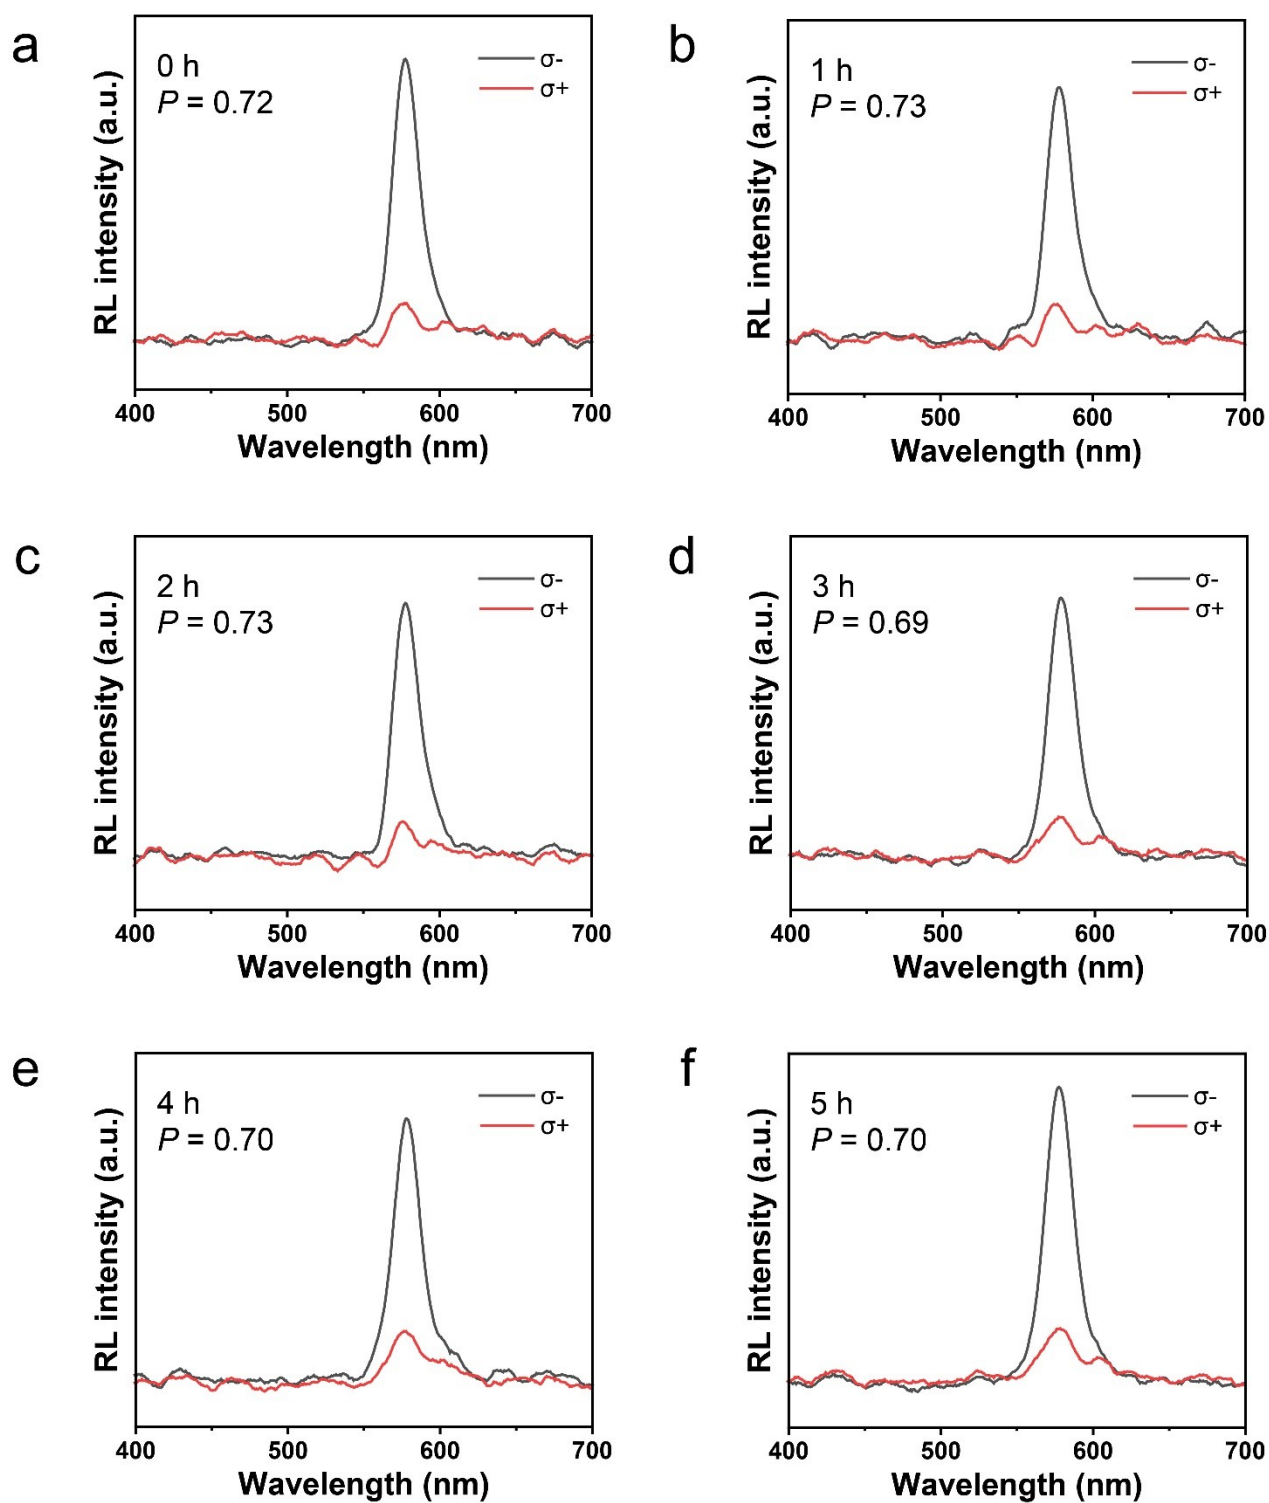

**Figure S15.** Polarization-resolved radioluminescence spectra of FAPbBr<sub>3</sub>-based *R*-architecture under air exposure lasting for (a) 0 h, (b) 1 h, (c) 2 h, (d) 3 h, (e) 4 h and (f) 5 h under air exposure.

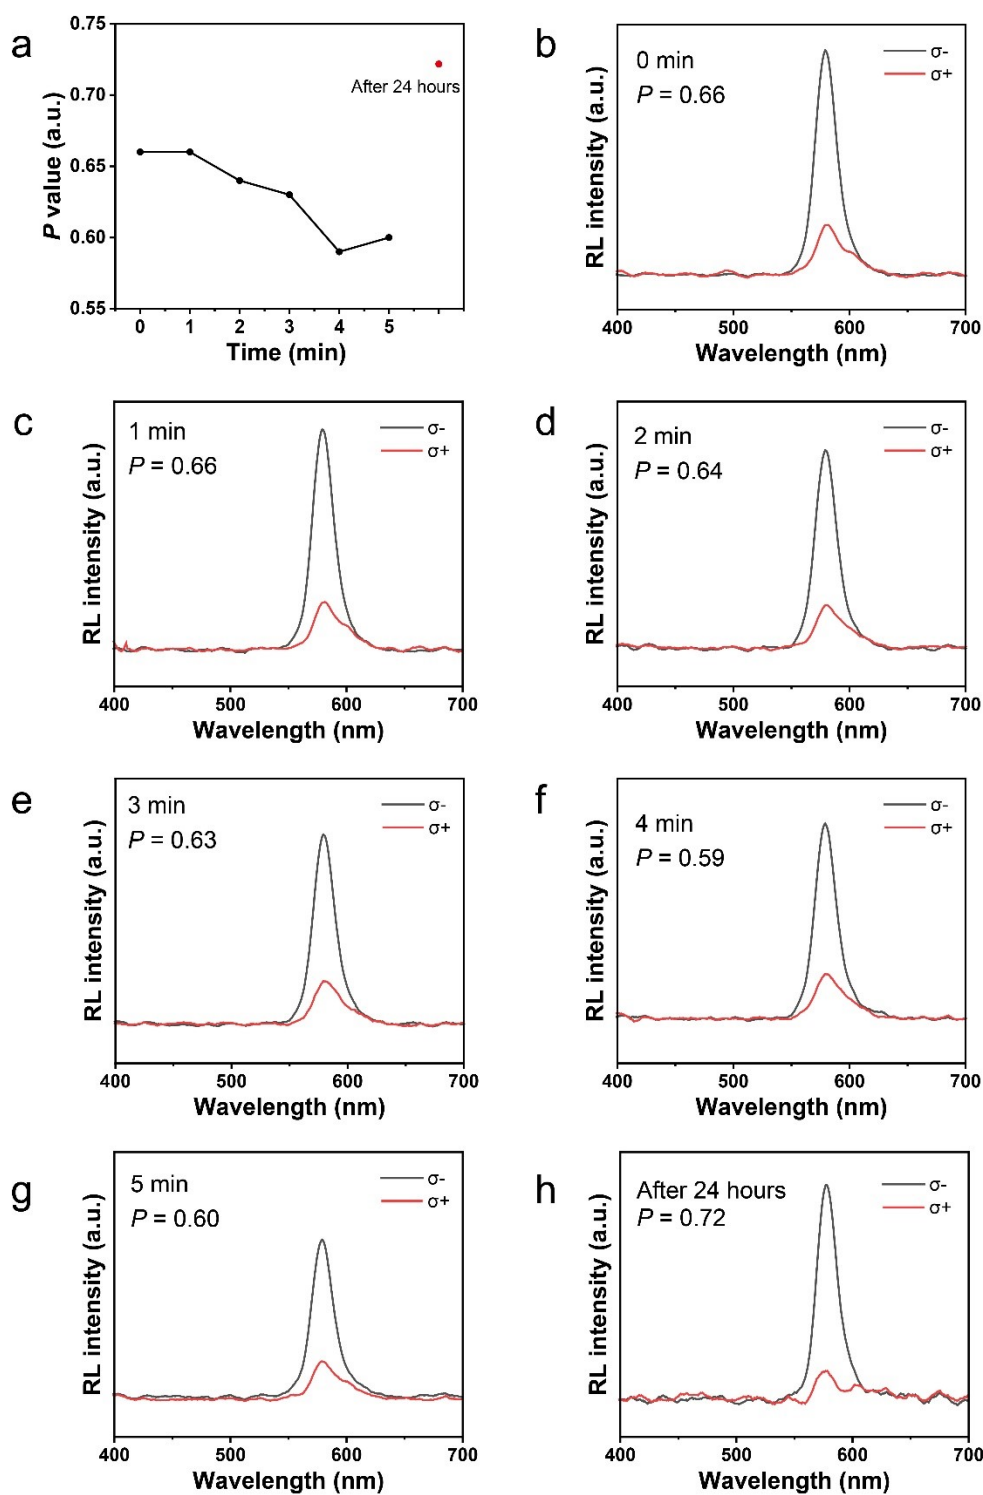

**Figure S16.** (a) Variation in  $P$  values of FAPbBr<sub>3</sub>-based *R*-architecture as a function of continuous X-ray irradiation lasting for 5 minutes. (b-g) Polarization-resolved radioluminescence spectra of FAPbBr<sub>3</sub>-based *R*-architecture under continuous X-ray irradiation lasting for 0-5 min. (h) Polarization-resolved radioluminescence spectra of FAPbBr<sub>3</sub>-based *R*-architecture at 24 hours following the completion of irradiation.

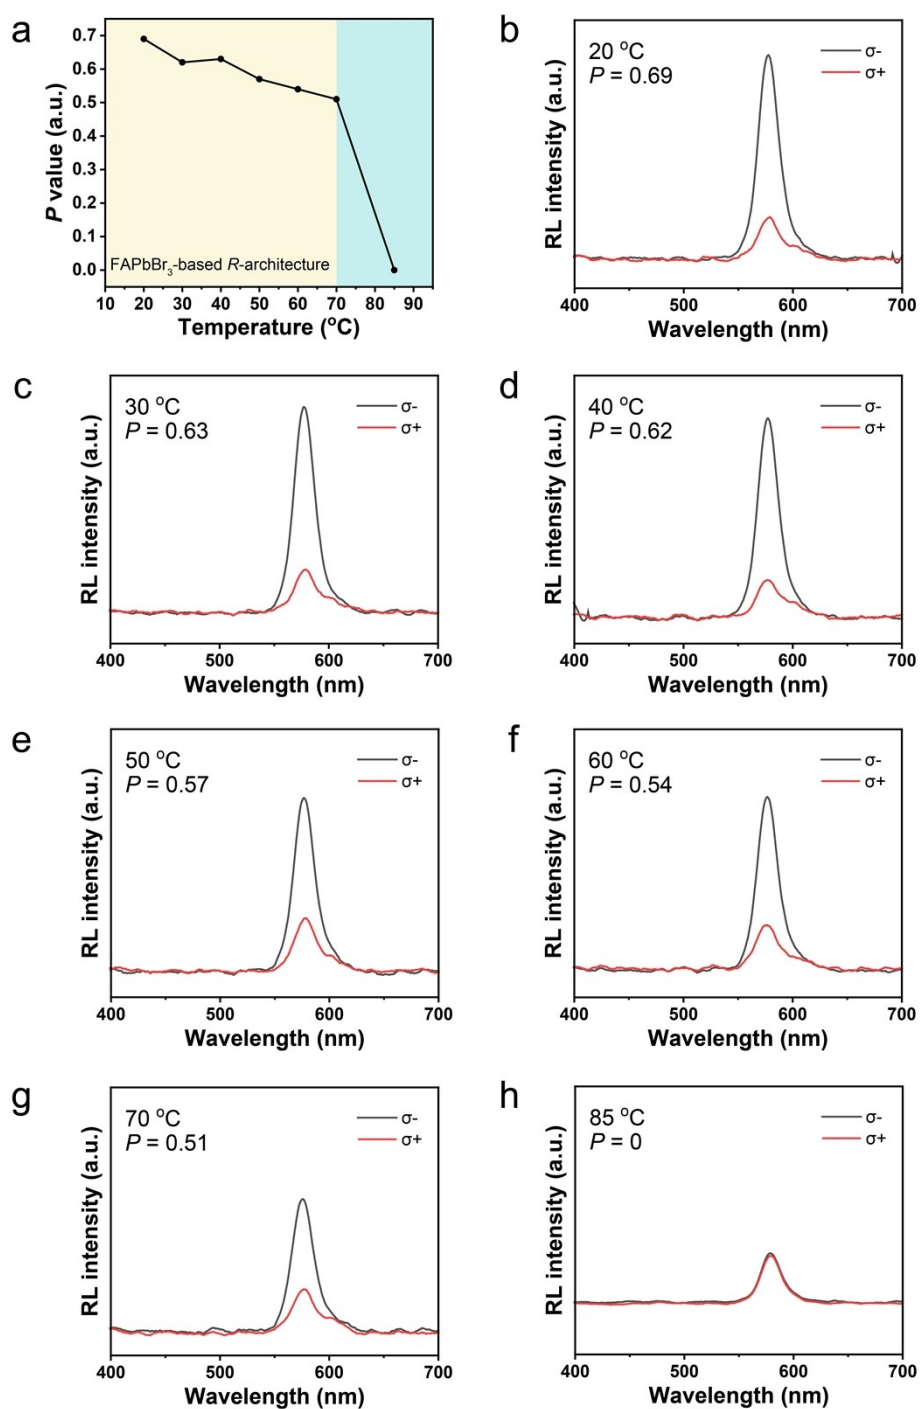

**Figure S17.** (a) Variation in  $P$  values of FAPbBr<sub>3</sub>-based R-architecture as a function of temperature. The clearing point of chiral LC is 85°C. (b-h) Polarization-resolved radioluminescence spectra of FAPbBr<sub>3</sub>-based R-architecture under different temperature.

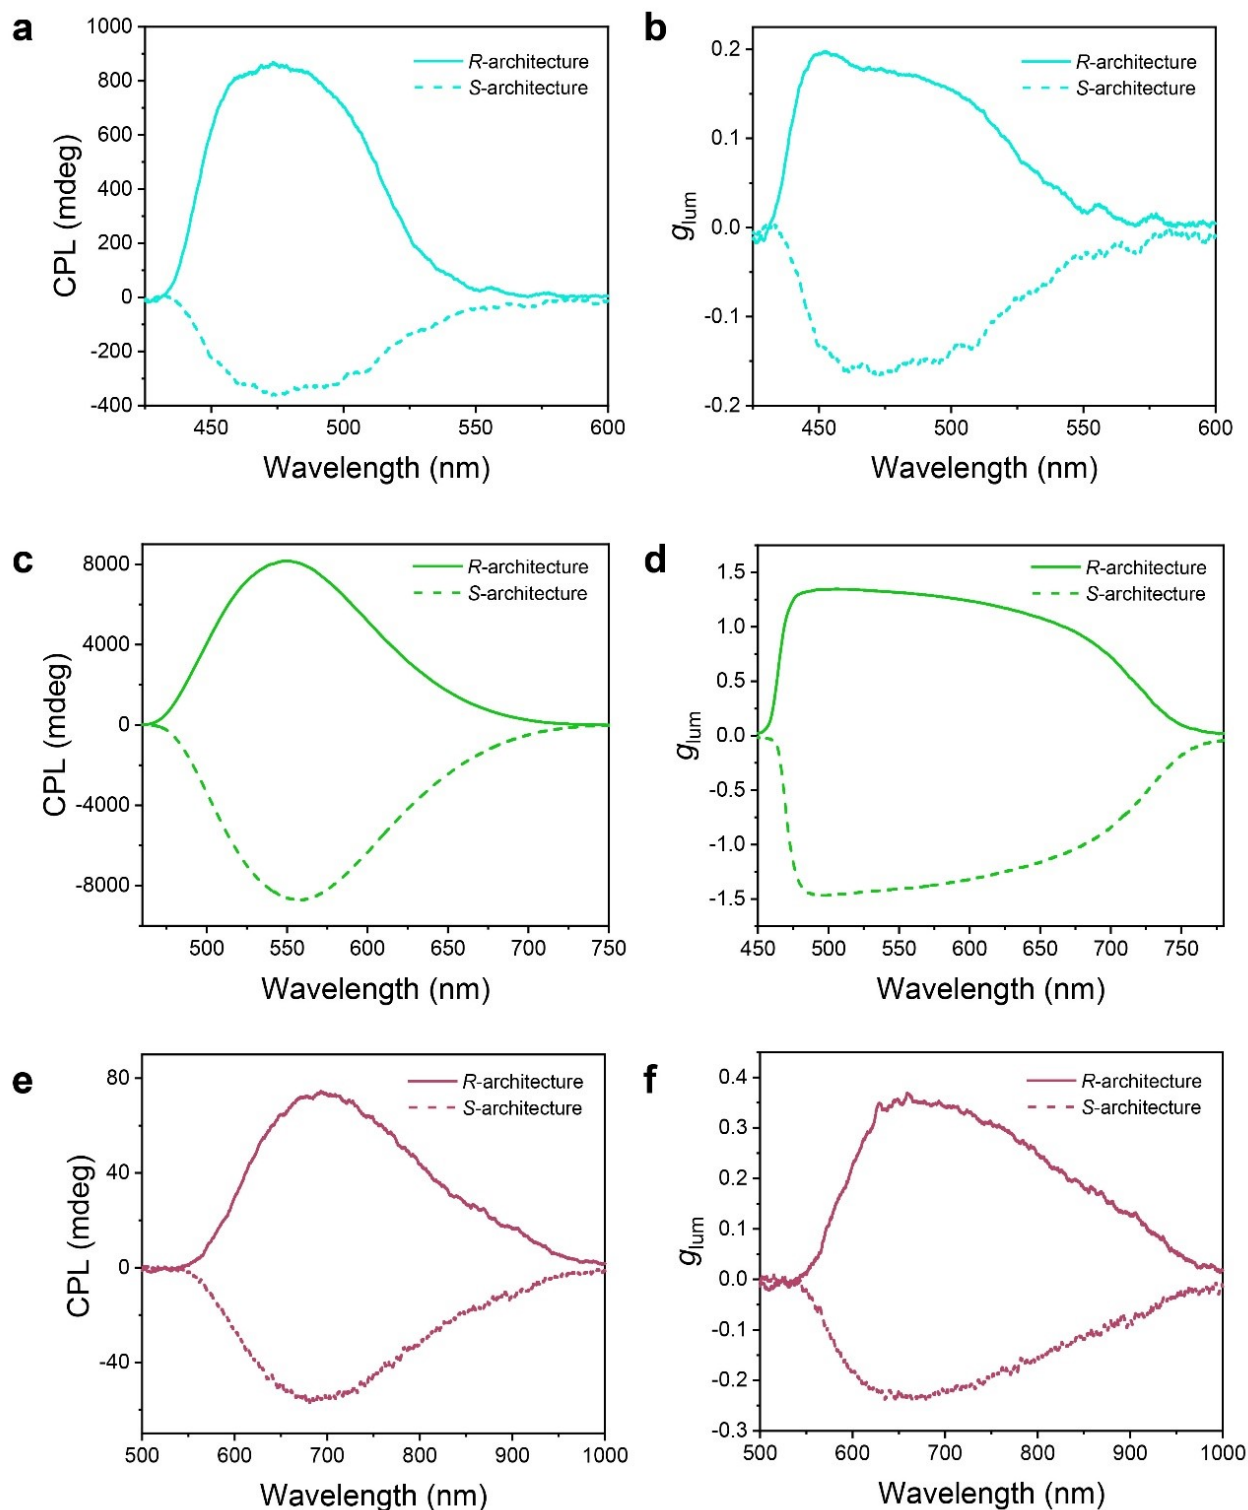

**Figure S18.** In a typical experiment, CPL spectra of *R/S*-architecture based on (a, b) FAPbClBr<sub>2</sub>, (c, d) FAPbBr<sub>3</sub> and (e, f) FAPbBrI<sub>2</sub> perovskite nanocrystals conducted on commercial JASCO CPL-300 spectrometer excited by Xe lamp.

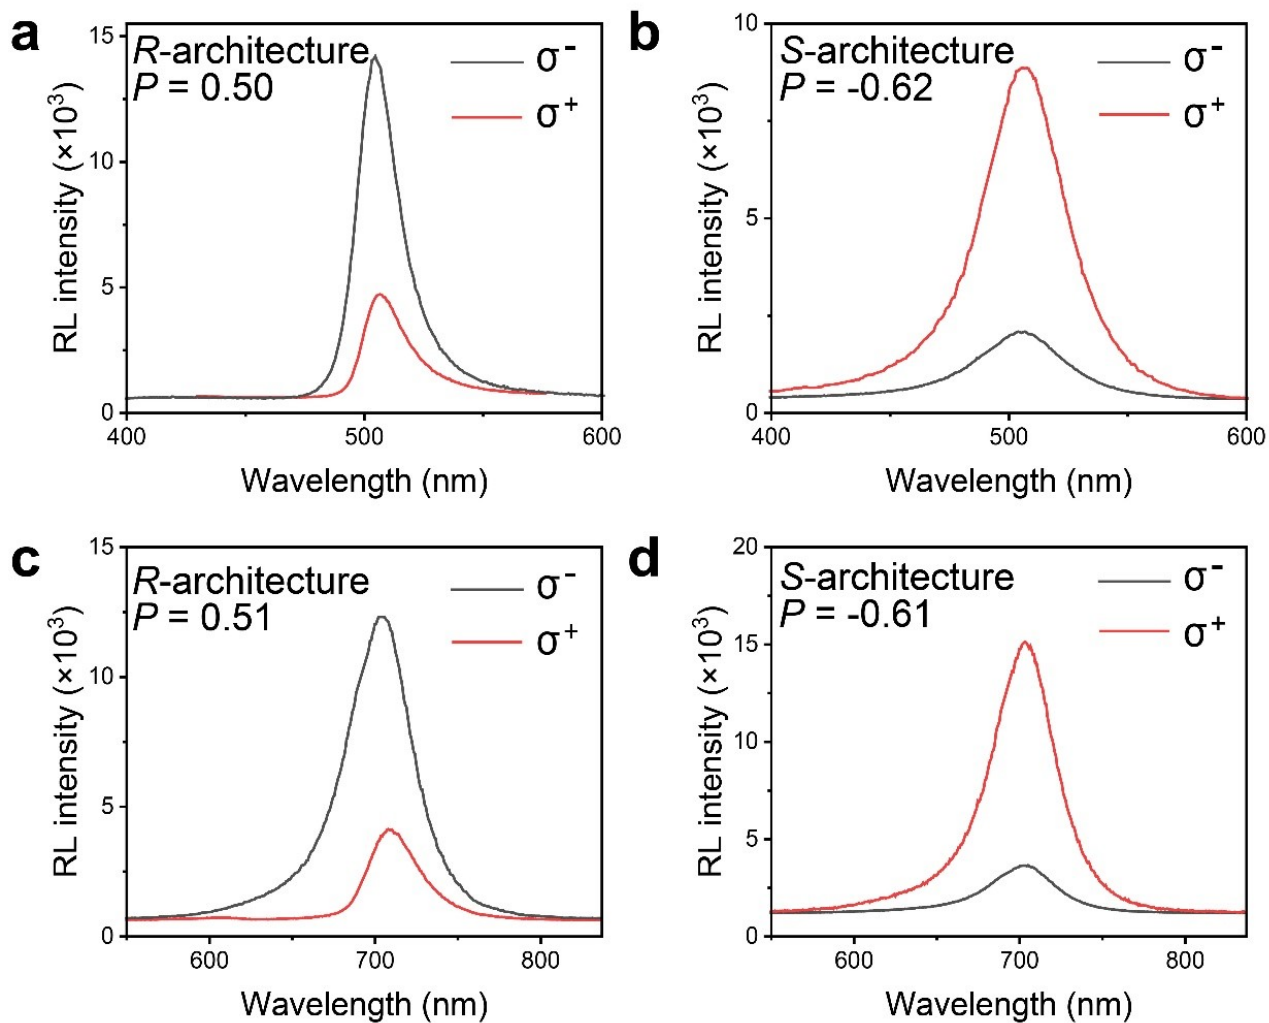

**Figure S19.** Polarization-resolved radioluminescence spectra and corresponding  $P$  values of (a) FAPbClBr<sub>2</sub>-based  $R$ -architecture, (b) FAPbClBr<sub>2</sub>-based  $S$ -architecture, (c) FAPbBrI<sub>2</sub>-based  $R$ -architecture and (d) FAPbBrI<sub>2</sub>-based  $S$ -architecture under X-ray excitation in a typical experiment.

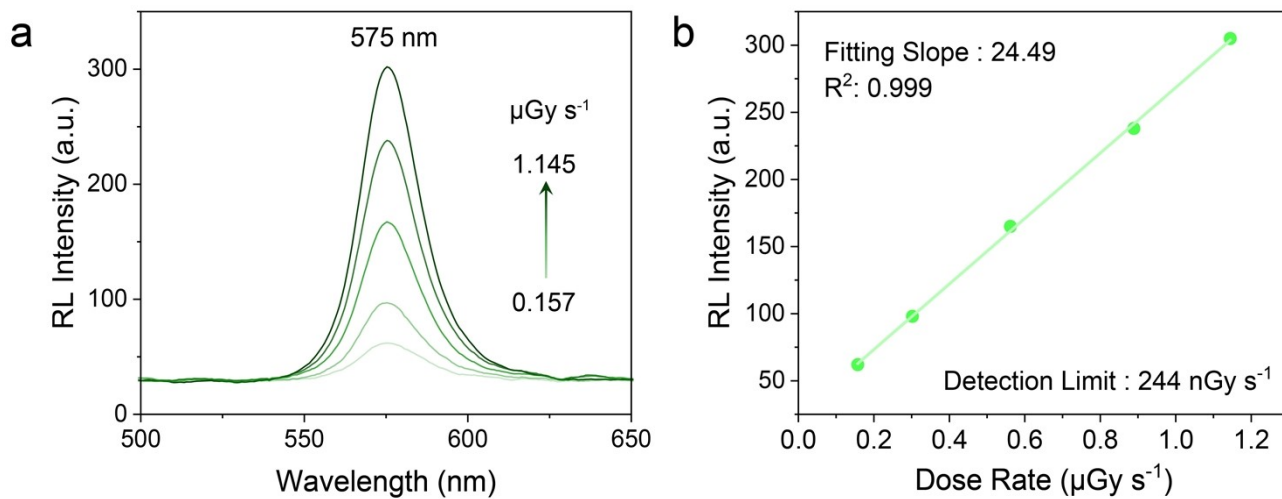

**Figure S20.** (a) Radioluminescence spectra of *S*-architecture under different X-ray dose rates; (b) X-Ray detection limit of *S*-architecture.

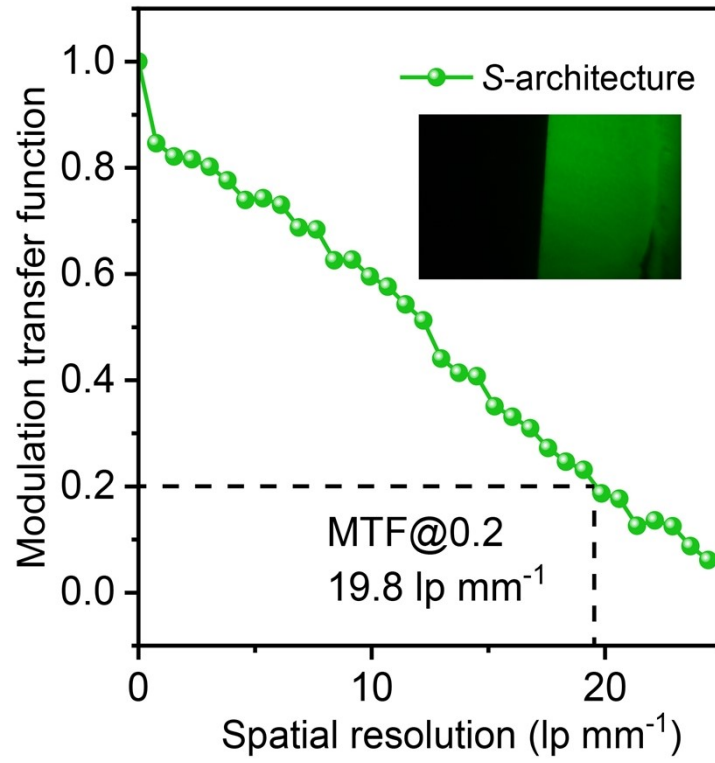

**Figure S21.** Modulation transfer function (MTF) of X-ray imaging (inset) obtained from *S*-architecture.

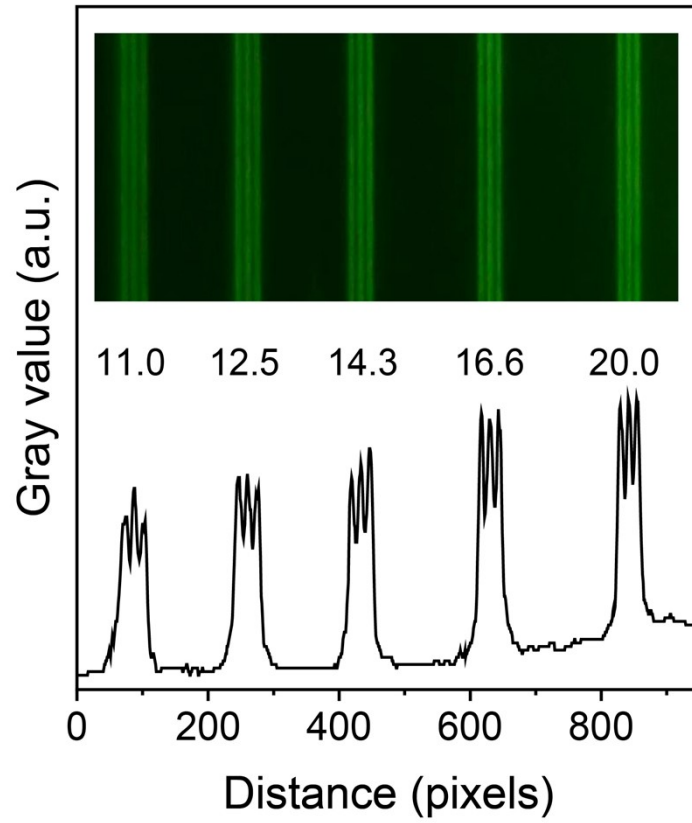

**Figure S22.** X-ray imaging of a standard resolution test pattern of *S*-architecture, showing resolved image resolutions from 11 to 20 lp mm<sup>-1</sup>.

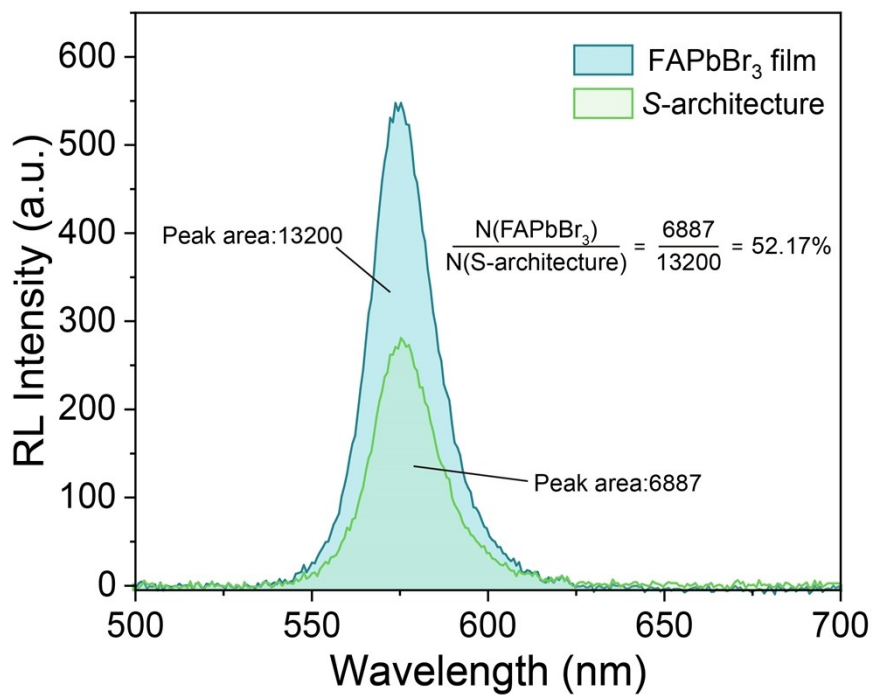

**Figure S23.** Radioluminescence (RL) spectra of FAPbBr<sub>3</sub> and *S*-architecture, measured under the same conditions.  $N(\text{FAPbBr}_3)$  and  $N(\text{S-architecture})$  denote photons counts of FAPbBr<sub>3</sub> and *S*-architecture, respectively.

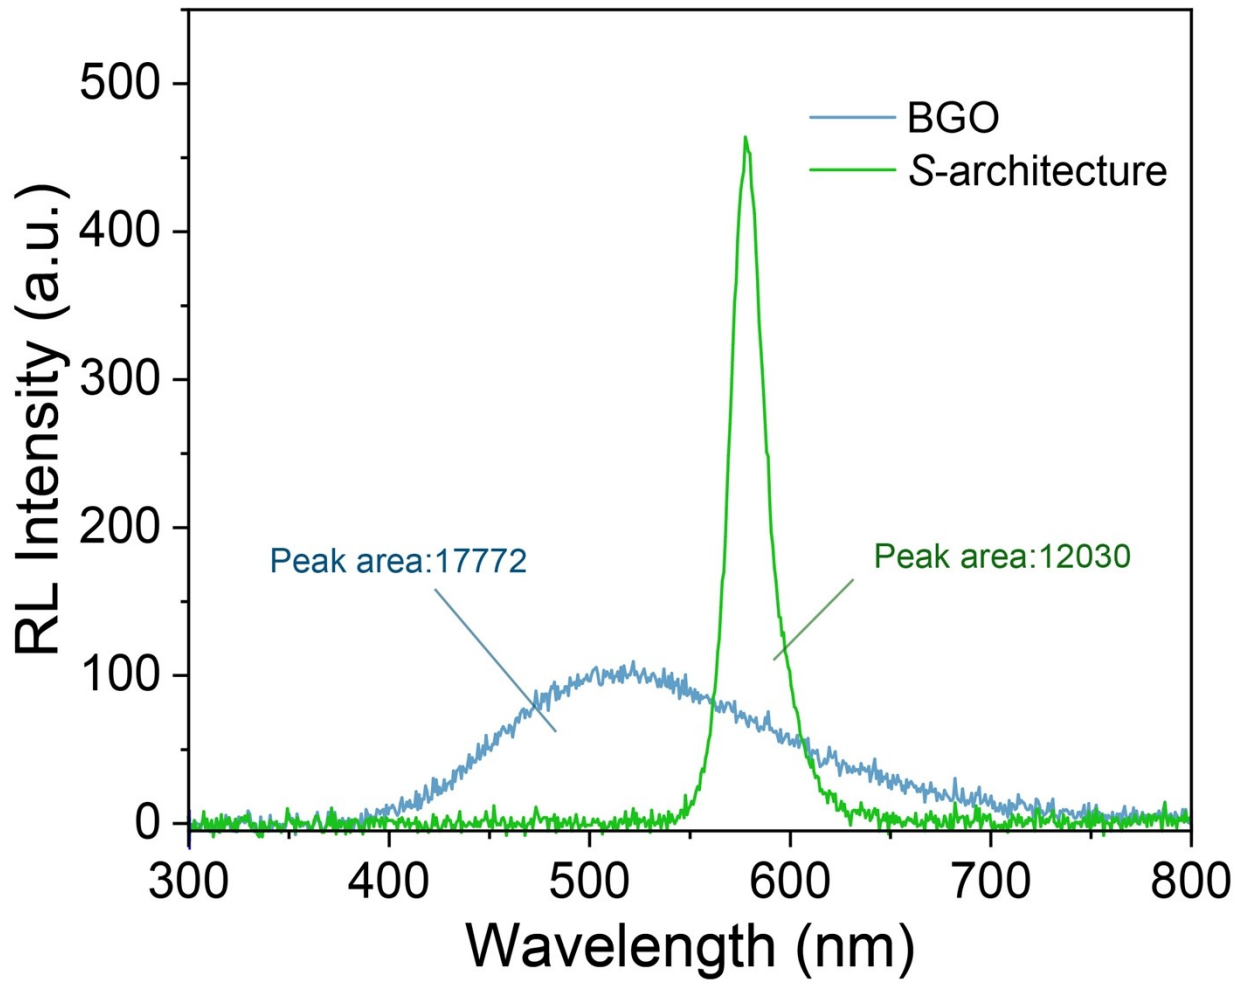

**Figure S24.** RL spectra of BGO and *S*-architecture, measured under the same conditions.

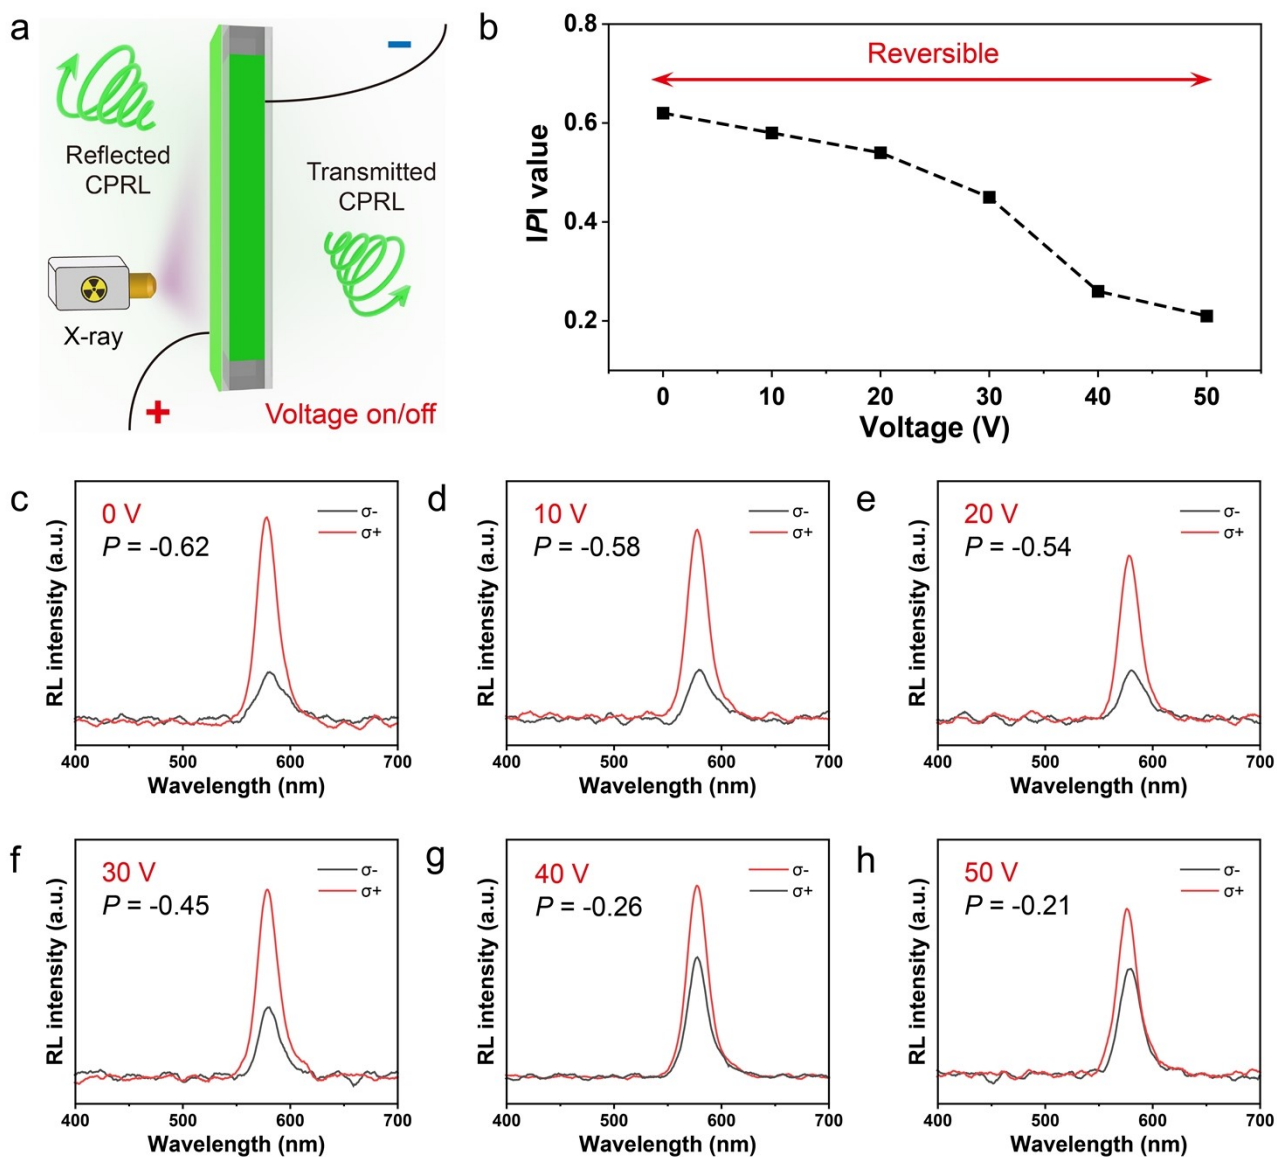

**Figure S25.** (a) Schematic illustration of CPRL generation from the chiral nanoscintillator architecture through the application of an external electric field. The cell was fabricated using ITO glass substrates. (b) The corresponding  $P$  as a function of the applied voltage, demonstrating reversible modulation. (c-h) Polarization-resolved radioluminescence spectra of an FAPbBr<sub>3</sub>-based  $S$ -architecture under different applied voltages.
